# Supplementary material for: Enhanced photocatalytic H2 production on cadmium sulfide photocatalysts using nickel nitride as a novel cocatalyst
Source: Royal Society of Chemistry journal article supplement (doi:10.1039/c6ta04696g), 2016-01-01
Supplement: c6ta04696g1.pdf [file c6ta04696g1.pdf]

***Supporting Information***

**Nickel nitride modified cadmium sulfide nanorods with  
enhanced visible light photocatalytic H<sub>2</sub> evolution**

Zijun Sun, Huanlin Chen, Lei Zhang, Pingwu Du\*

Key Laboratory of Materials for Energy Conversion, Chinese Academy of Sciences,  
Department of Materials Science and Engineering, and the Collaborative Innovation  
Center of Chemistry for Energy Materials (*iChEM*), University of Science and  
Technology of China, No. 96 Jinzhai Road, Hefei, Anhui Province, 230026, P. R.  
China

\*To whom correspondence should be addressed

E-mail: [dupingwu@ustc.edu.cn](mailto:dupingwu@ustc.edu.cn)

Tel/Fax: 86-551-63606207

| <b>Sample</b> | <b>Ni (wt%)/<br/>ICP-AES data</b> | <b>Ni<sub>3</sub>N (wt%)/<br/>Calculated based on Cu</b> |
|---------------|-----------------------------------|----------------------------------------------------------|
| N1            | 1.07                              | 1.15                                                     |
| N2            | 1.50                              | 1.62                                                     |
| N3            | 4.50                              | 4.86                                                     |
| N4            | 7.56                              | 8.16                                                     |
| N5            | 10.71                             | 11.56                                                    |

**Table S1.** Nickel and Ni<sub>3</sub>N contents in Ni<sub>3</sub>N/CdS photocatalyst samples.

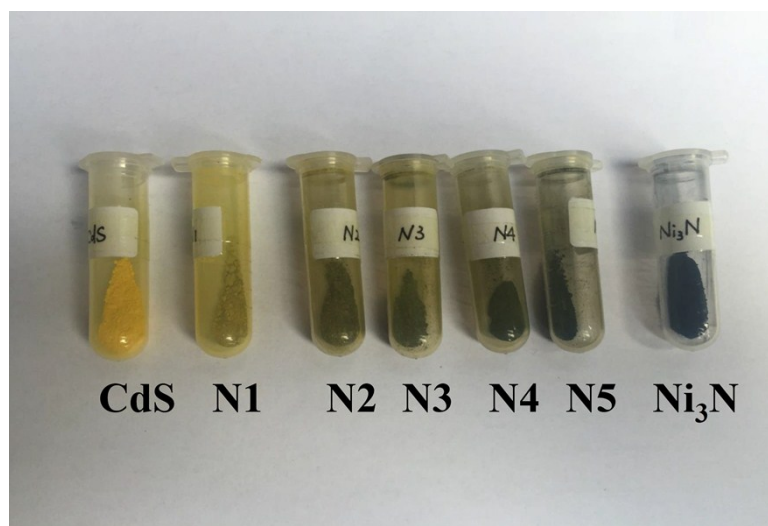

**Figure S1.** The picture of CdS, Ni<sub>3</sub>N/CdS and Ni<sub>3</sub>N samples.

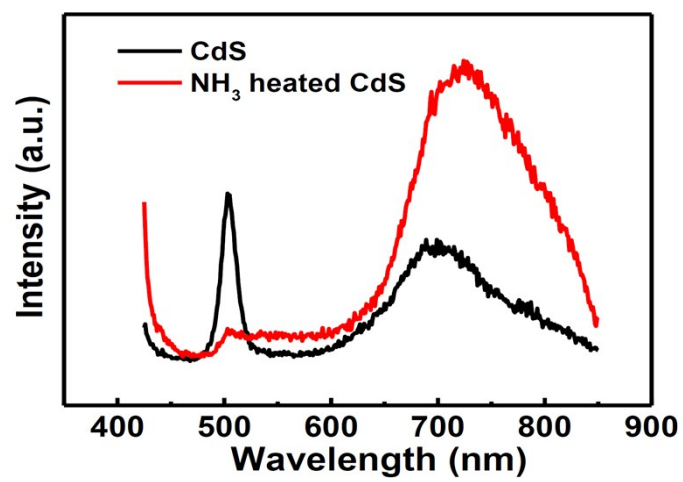

**Figure S2.** PL spectra of CdS and CdS heated under NH<sub>3</sub>.

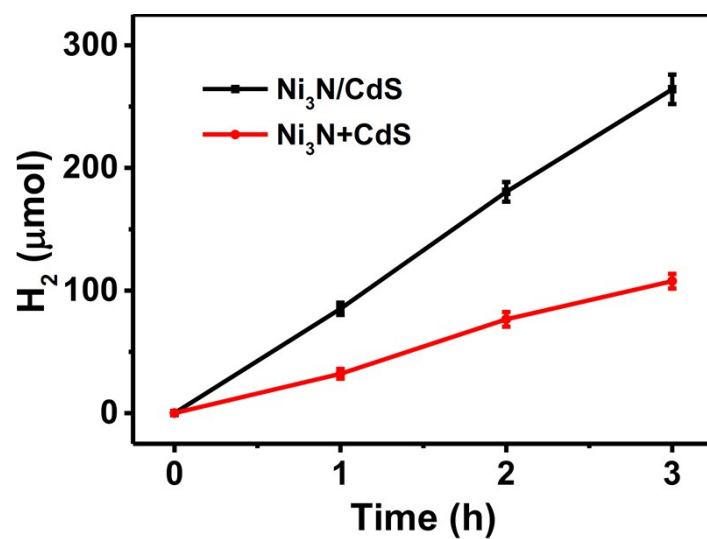

**Figure S3.** Comparison of photocatalytic H<sub>2</sub> production activity of mixed Ni<sub>3</sub>N+CdS and N3 sample in 0.25 M Na<sub>2</sub>S/0.35 M Na<sub>2</sub>SO<sub>3</sub> solution.

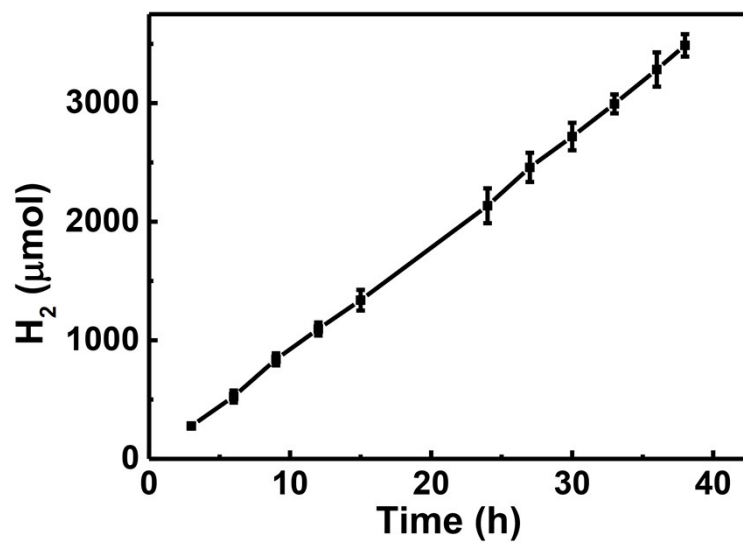

**Figure S4.** Long-term visible light irradiation using 1.0 mg N3 sample in 0.25 M  $\text{Na}_2\text{S}$ /0.35 M  $\text{Na}_2\text{SO}_3$  solution.

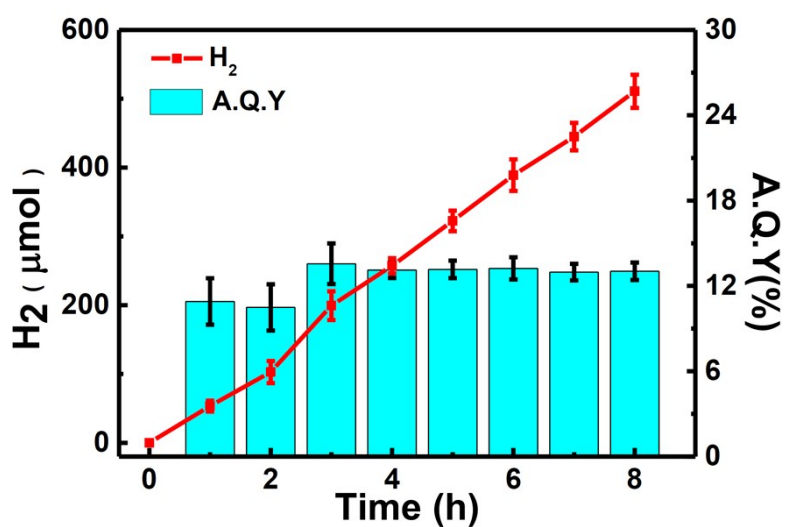

**Figure S5.** Time courses of  $H_2$  production and apparent quantum yield on 1.0 mg N3 samples in 0.75 M  $Na_2S$ /1.05 M  $Na_2SO_3$  aqueous solution under 420 nm monochromatic light irradiation.

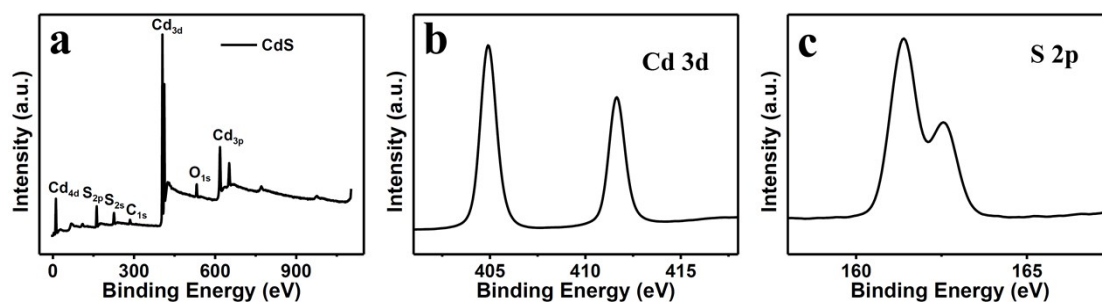

**Figure S6.** (a) XPS survey spectrum and high-resolution XPS spectra of (b) Cd 3d, (c) S 2p of the CdS sample.

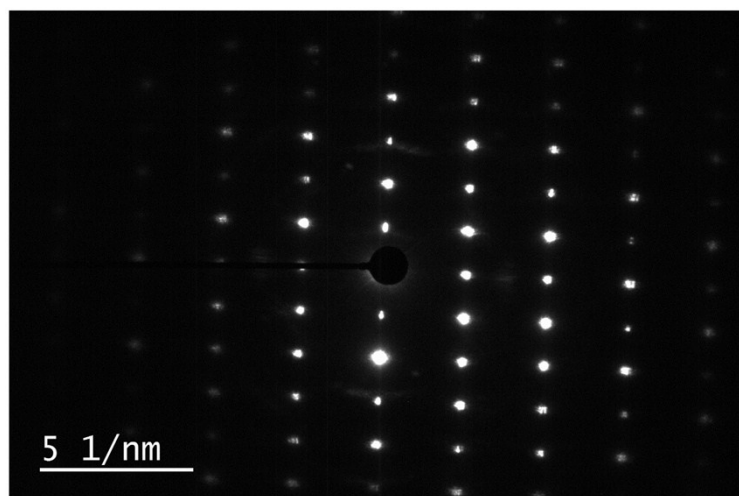

**Figure S7.** Selected area electron diffraction (SAED) data of the N3 samples.

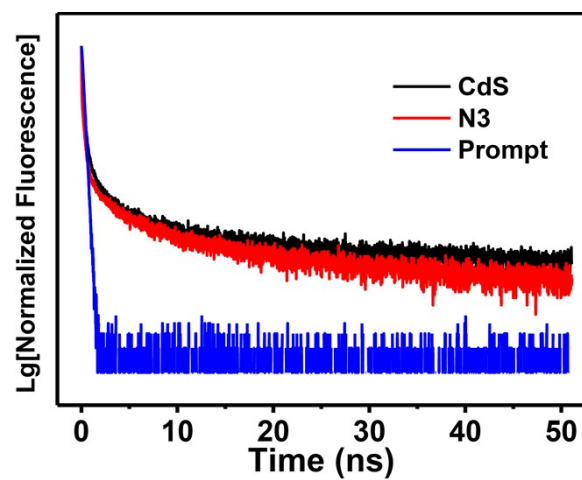

**Figure S8.** TRPL spectra of the CdS and N3 samples.
